# Supplementary material for: A Concentration Method for HIV Drug Resistance Testing in Low-Level Viremia Samples
Source: Biomed Res Int. 2022 Nov 23;2022:2100254. doi: 10.1155/2022/2100254 (PMC9711986; doi:10.1155/2022/2100254)
Supplement: Supplementary Materials — The characteristics of the 20 participants are shown in Supplementary Table 1. Supplementary table 2 shows the resistance profiles of undiluted clinical specimens and is used as a reference to assess the detection of additional mutations or lack of mutations. [file 2100254.f1.zip]

Archive with 2 entries (2 files):
- Supplementart Table 2.docx
- Supplementary Table 1.docx
